# Supplementary material for: OBS noise reduction from horizontal and vertical components using harmonic-percussive separation algorithms
Source: Copernicus journal article supplement (doi:10.5194/egusphere-2022-823), 2022-10-04
Supplement: Supplementary file 1 [file egusphere-2022-823-supplement-version3.zip]

Archive with 3 entries (3 files):
- Events Table.xlsx
- NoiseCut.ipynb
- Supplemental Material.pdf
