# Supplementary material for: OBS noise reduction from horizontal and vertical components using harmonic-percussive separation algorithms
Source: Copernicus journal article supplement (doi:10.5194/egusphere-2022-823), 2022-10-04
Supplement: Supplementary file 1 [file egusphere-2022-823-supplement-version3.zip › NoiseCut.ipynb]

# %% [code]
# author: Zahra Zali
# This code along with an example of real data is freely available from https://github.com/ZahraZali/NoiseCut 
# HPS noise reduction algorithm created for noise reduction of OBS data based on harmonic percussive separation (HPS) algorithms
# The outputs are: 1- mseed file of the noise reduced signal.
# 2- A figure shows the spectrogram of the original signal and the spectrogram of the separated noise.

from obspy import read
import numpy as np
import librosa
import librosa.display
from obspy import UTCDateTime, read, Trace, Stream
import matplotlib.pyplot as plt

#read the file and convert the data to float which is suitable for using in Librosa
file= ('D10.DO.HH4..D.2012.080.000000')    
trace= read (file)
x=trace[0].data
y=x.astype(float)
    
sr=16000
hop_length=4096
win_length=16384
n_fft= 16384  # We choose a large n_fft in order to have high resolution in frequency domain in the STFT (short time fourier transform)


# Calculate the amplitude and phase of the spectrogram of the signal
S_full, phase = librosa.magphase(librosa.stft(y, n_fft= n_fft, hop_length=hop_length, win_length=win_length))

# We create two matrixs from S_full. The first one (S_full1) will be used for the step 1 (HPS using similarity matrix)
# The second one (S_full2) will be used for the step 2 (HPS using median filtering)
# [0.1-0.5]Hz= 16-82
# 1Hz=164

# S_full1 has 0 values in the frequency range of [0.1-1]Hz and is equalt to S_full out of this frequency range.
S_full1 = np.zeros((8193, 2110))
S_full1[:16,:]=S_full[:16,:]
S_full1[164:,:]=S_full[164:,:]

# S_full2 is equalt to S_full in the frequency range of [0.1-1]Hz and is equalt to 0 out of this frequency range.
S_full2 = np.zeros((8193, 2110))
S_full2[16:164 ,:] =S_full[16:164 ,:]

# In the step 1 we use S_full1 for the HPS using similarity matrix
# We compare frames using cosine similarity, and aggregate similar frames by taking their (per-frequency) median value.
# We use a waiting factor for the similarity calculation by defining the "width= 200" which ensures that the earthquake signal wouldn't be captured as noise
S_filter = librosa.decompose.nn_filter(S_full1,aggregate=np.median,metric='cosine',width=200)
    
# The output of the filter shouldn't be greater than the input
S_filter = np.minimum(np.abs(S_full1), np.abs(S_filter))
margin_i = 1
power = 2

# We create a mask using the harmonic component
mask_i = librosa.util.softmask(S_filter,margin_i * (S_full1 - S_filter),power=power)

# Once we have the mask, simply multiply it with the input spectrogram to separate the harmonic component
S_background = mask_i * S_full1

# In the step 2 we use S_full2 for the HPS using median filtering
D_harmonic, D_percussive = librosa.decompose.hpss(S_full2,kernel_size=80,  margin=5)

# The final noise spectrogram is the sum of 2 harmonic components derived from 2 steps
S_background=S_background+D_harmonic
    
# We multiply the noise spectrogram with the phase matrix
f=S_background*phase
L = x.shape[0]

# We reconstruct the noise signal in time domain using the inversion of STFT 
new = librosa.istft(f, hop_length=hop_length, win_length=win_length, window='hann', length=L)

# We create the OBS noise reducted signal by subtracting the noise signal from the original OBS signal
z=x-new
stats = trace[0].stats
stats.location= 'nc'
st = Stream([Trace(data=z, header=stats)])
st.write( 'D10.DO.HH4..D.2012.080.000000-noisecut.mseed', format='MSEED', encoding=5, reclen=4096)

# We plot the spectrograms of the original signal and the separated noise signal
fig= plt.figure(figsize=(12, 6))
plt.subplot(2, 1, 1)
librosa.display.specshow(librosa.power_to_db(S_full, ref=np.max),y_axis='log', sr=sr)
plt.title('Full spectrogram', fontsize= 14)
plt.ylabel('Frequency (Hz)', fontsize= 14)
freq =[0,128, 512, 2048, 8000]
labelsy = [0, 0.8, 3.2, 12.8, 50]
plt.yticks (freq, labelsy, fontsize= 14)
labelcl= ['-80dB','','-40dB','','0dB']
cbar= plt.colorbar(pad= 0.01)
cbar.ax.set_yticklabels(labelcl, rotation=90)
cbar.ax.tick_params(labelsize=14)

plt.subplot(2, 1, 2)
librosa.display.specshow(librosa.power_to_db(np.abs(S_background)), sr=sr,y_axis='log')
plt.ylabel('Frequency (Hz)', fontsize= 14)
plt.title('Noise spectrogram', fontsize= 14)
freq =[0,128, 512, 2048, 8000]
labelsy = [0, 0.8, 3.2, 12.8, 50]
labelsx = [0,4,8,12,16,20,24]
plt.yticks (freq, labelsy, fontsize= 14)
labelcl= ['20dB','','60dB','']
cbar= plt.colorbar(pad= 0.01)
cbar.ax.set_yticklabels(labelcl, rotation=90)
cbar.ax.tick_params(labelsize=14)
    
fig.savefig ('D10.DO.HH4..D.2012.080.000000-noisecut.png', dpi=100)
plt.show()
plt.close(fig)

# %% [code]
