# Supplementary material for: OBS noise reduction from horizontal and vertical components using harmonic-percussive separation algorithms
Source: Copernicus journal article supplement (doi:10.5194/egusphere-2022-823), 2022-10-04
Supplement: Supplementary file 1 [file Events Table.xlsx]

## Sheet: EventTableSNR
Event No.	DATE	JULIAN DAY	LATITUDE [°]	LONGITUDE [°]	DEPTH [km]	MAGNITUDE Mw	DISTANCE [°]	SW	RF	RF -H	SNR SO-Z	SNR-IF Z	SNR SO-R	SNR-IF R	SNR SO-T	SNR-IF T
1	2011-07-19T19:35:43	200	40.1562	71.5011	19.5	6.2	66.7828	11			1.04342	1.16707	0.736099	1.70763
2	2012-02-13T10:55:09	44	9.183	-84.121	16	5.9	65.1799				1.19125	1.13842
3	2011-09-16T19:26:40	259	40.2958	142.924	29.7	6.7	99.7693	21			1.24845	1.05911
4	2012-01-01T05:27:55	1	31.4682	138.183	359.7	6.8	107.136				1.46014	0.989615			1.4125	1.24252
5	2012-03-21T22:15:06	81	-6.242	145.955	118	6.6	145.148				1.57748	1.23252
6	2011-07-10T00:57:07	191	38.03	143.26	23	7	102.028		x		1.62544	1.1152	3.22357	1.39251	1.41085	1.76398
7	2011-09-09T19:41:33	252	49.3886	-127.065	15.4	6.5	72.0702				1.72603	1.09632	1.1019	1.43657	1.19607	1.28722
8	2011-10-06T11:12:30	279	-24.18	-64.22	15	5.8	75.6077	23			1.75984	1.17282
9	2011-12-27T15:21:56	361	51.84	95.91	15	6.6	73.5882	16	x	-	1.87266	1.57806	1.12328	2.41286	1.13058	1.65987
10	2012-04-12T07:15:49	103	28.8386	-113.127	10	7	75.8981	9			1.87383	1.12203	1.48109	1.82837	4.68094	1.26652
11	2012-04-17T03:50:15	108	-32.64	-71.37	29	6.7	86.1422				2.04954	1.14635	1.05136	2.16772
12	2011-09-05T09:52:01	248	-15.3	-173.62	37	6.2	148.232		x		2.08124	1.2208
13	2011-12-14T05:04:58	348	-7.55	146.81	146.81	7.1	146.667				2.151	1.51164
14	2012-03-14T09:08:36	74	40.842	145.015	19.2	7	99.612	5			2.20758	1.10229	2.31	1.05
15	2012-02-06T03:49:12	37	9.999	123.206	11	6.7	120.251	15	x		2.2225	1.28613
16	2011-09-15T19:31:04	258	-21.61	-179.53	644.6	7.3	156.66				2.25405	1.34488
17	2011-08-30T06:57:41	242	-6.3592	126.75	469.8	6.9	135.545				2.30856	1.06477
18	2012-03-25T22:37:06	85	-35.2035	-72.1268	28.2	7.1	88.5287	7	x	-	2.38549	1.41242	2.42211	1.73784	1.92465	1.50809
19	2012-01-30T05:10:59	30	-14.2139	-75.6584	34.2	6.4	74.7862	12	x		2.40513	1.11816	1.43981	1.21521	1.07061	1.85498
20	2012-02-26T06:17:19	57	51.8008	95.9804	13	6.5	73.6469	13	x	-	2.87068	1.15722	1.72382	1.16832	1.25474	2.35566
21	2011-10-14T03:35:14	287	-6.57	147.88	37	6.5	146.099	24	x		2.93845	1.05345
22	2011-11-22T18:48:16	326	-15.3083	-65.1634	560.3	6.6	69.0163		x	-	2.94391	1.11212	1.76246	1.72142	1.10738	1.1937
23	2011-09-02T10:55:54	245	52.1018	-171.718	46	7	86.699		x		2.95804	1.05303	2.2642	1.99065	2.43053	2.37781
24	2011-12-11T01:47:25	345	17.99	-99.79	59	6.5	72.2427		x		3.17092	1.33193	1.59122	3.74084	1.66659	1.47257
25	2011-09-18T12:40:49	261	27.8039	88.1536	29.6	7.4	85.2049		x	-	3.4166	1.42788	1.28409	2.46275	1.54979	3.20848
26	2011-09-02T13:47:10	245	-28.4135	-63.136	592.7	6.1	99.7693	3	x	-	3.91387	1.39183	1.95569	1.97976	1.55217	2.02325
27	2011-09-03T22:55:40	246	-20.67	169.72	185.1	7	160.926				4.02717	1.19391
28	2011-10-28T18:54:34	301	-14.5572	-76.1207	29	7	75.3432	4	x	-	4.09546	1.11192	0.998449	1.64856	1.58379	1.34535
29	2012-04-11T22:55:11	102	18.39	-102.74	10	6.7	74.293				4.28639	0.958727	1.10085	2.96917	1.76787	1.20757
30	2012-02-02T13:34:40	33	-17.827	167.133	23	7.1	158.88		x	-	4.94282	1.41177
31	2011-08-20T16:55:04	232	-18.2774	168.067	34.6	7.1	159.109				6.8952	0.946319
32	2011-10-21T17:57:17	294	-28.8809	-176.033	34.8	7.4	159.176			-	8.63021	1.21361	1.29228	1.68496	4.1203	1.25281
33	2012-04-11T08:38:37	102	2.2376	93.0144	26.3	8.6	105.694	8	x	-	9.5101	1.24286	3.71538	1.0093	1.84585	1.01467
34	2011-08-24T17:46:11	236	-7.6203	-74.538	149.3	7	69.2578	1	x	-	9.9403	1.08144	4.63166	1.61836	1.81958	2.03329
35	2012-04-17T07:13:50	108	-5.5	147.16	197	6.8	144.859		x	-	10.953	1.16067
36	2011-10-23T10:41:22	296	38.7294	43.4465	7.6	7	47.8235	2	x	-	11.5318	1.04227	2.80353	0.965562	3.32176	1.05605
37	2011-07-06T19:03:20	187	-29.3073	-176.257	25.4	7.6	159.572	10		-	19.4084	1.35775
38	2012-03-20T18:02:47	80	16.4734	-98.3694	19.4	7.3	72.0186	6	x	-	33.5935	1.05562	4.34665	1.27466	4.41912	1.09726
39	2011-07-08T05:53:03	189	0.9058	-26.4413	10	5.6	38.144	17
40	2011-07-11T20:47:04	192	9.5277	122.246	21.6	6.5	119.885	18
41	2011-07-16T19:59:12	197	54.7716	-161.316	40.9	6.1	81.447	19
42	2011-07-26T17:44:21	207	25.09	-109.537	17	6	75.243	20
43	2011-07-29T07:42:23	210	-23.8	179.75	532	6.7	158.75
44	2011-10-14T03:35:15	278	-6.6259	147.931	43.2	6.5	21.515	22
45	2011-11-06T03:53:10	310	35.5501	-96.7579	7.5	5.7	60.386	25
46	2012-01-22T05:53:43	22	-56.9317	-25.2293	18.7	6	95.485	14
